# Supplementary material for: Assessing the effectiveness of COVID-19 vaccine lotteries: A cross-state synthetic control methods approach
Source: PubMed Central journal article supplement (PMC9518920; doi:10.1371/journal.pone.0274374), 2022-09-28

Observed and Synthetic Vaccination Trend Lines by States with Lotteries (First-Dose)

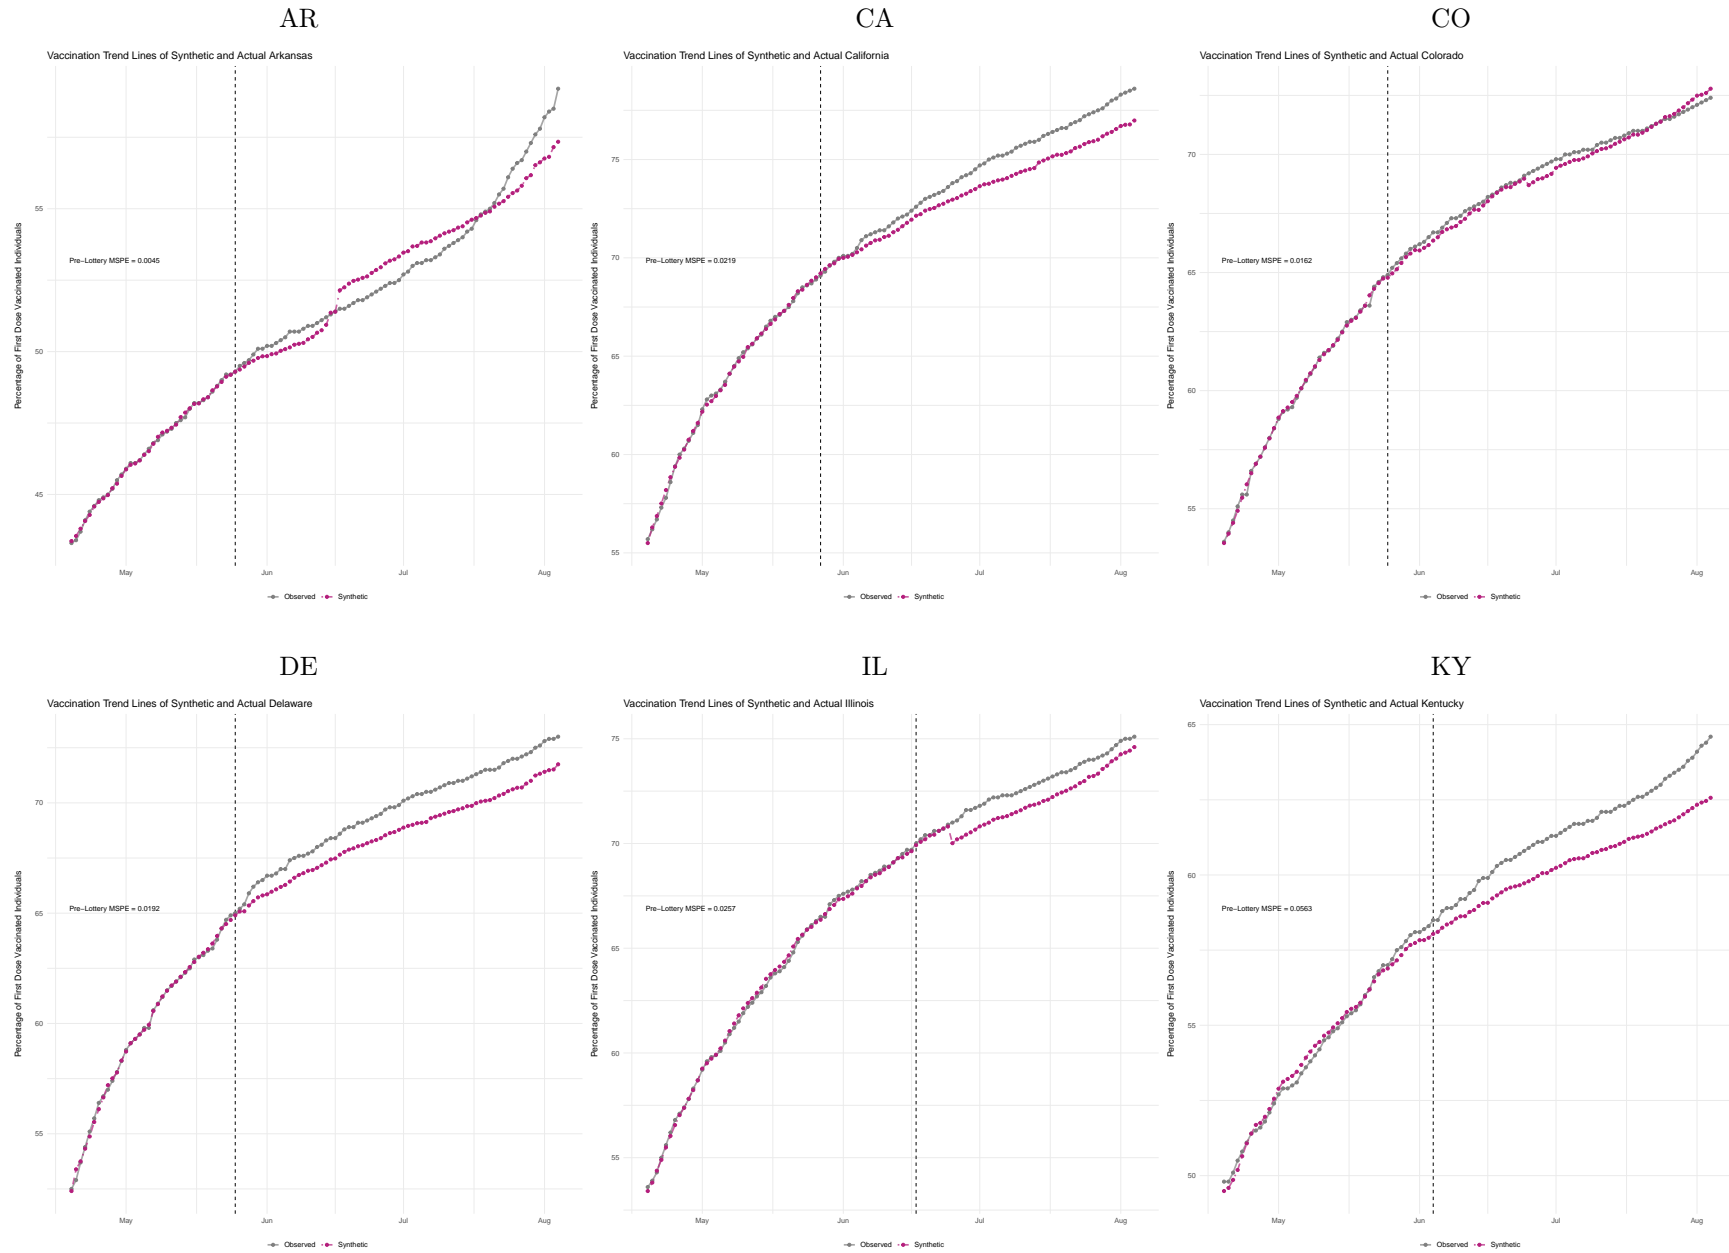

LA

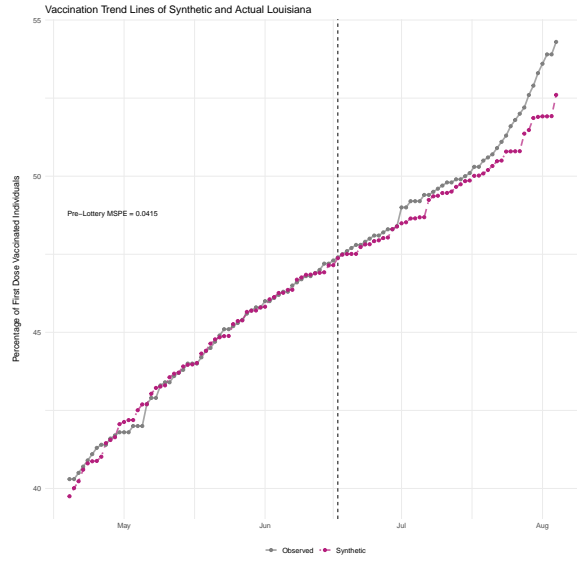

MA

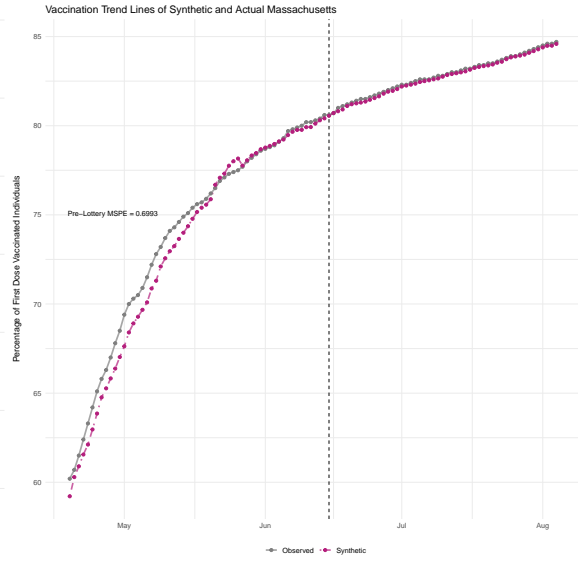

MD

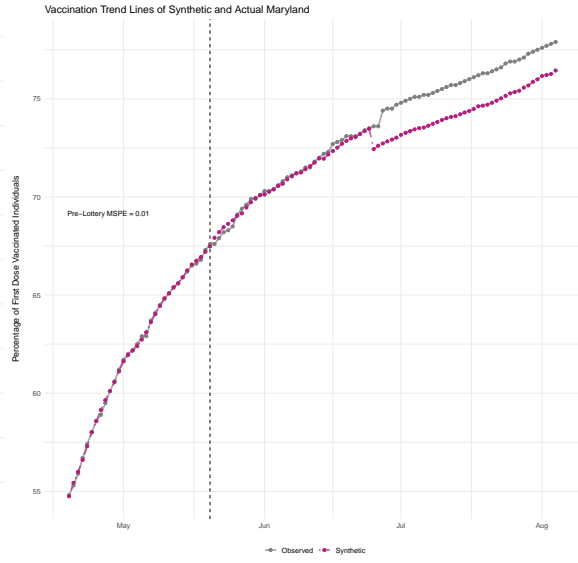

ME

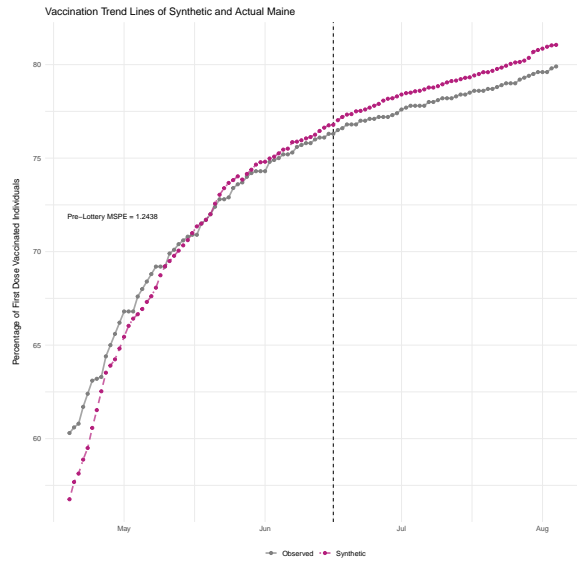

MI

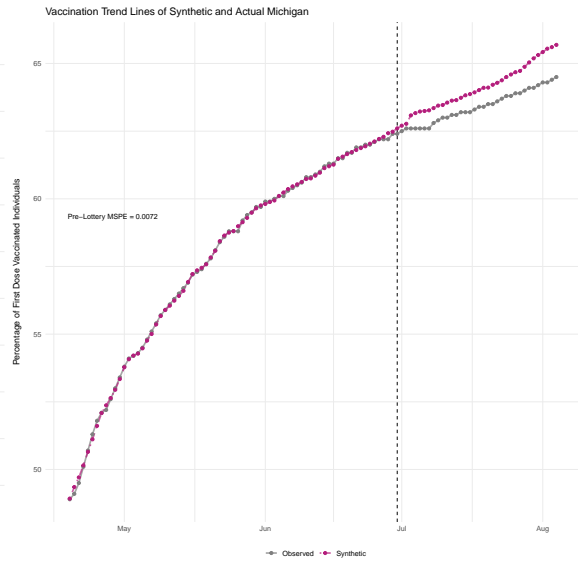

MO

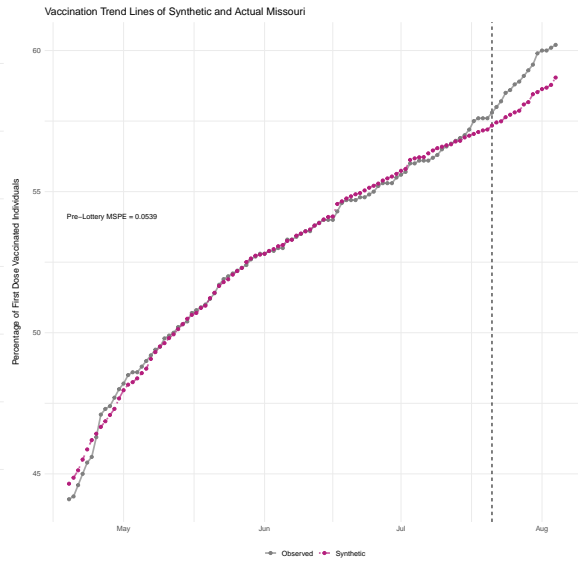

NC

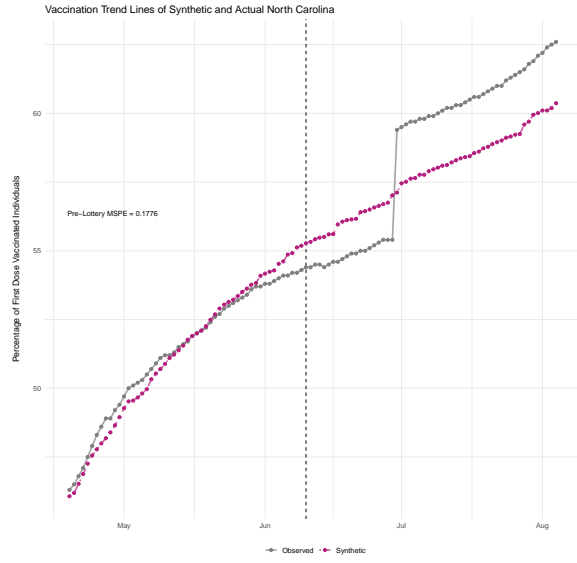

NM

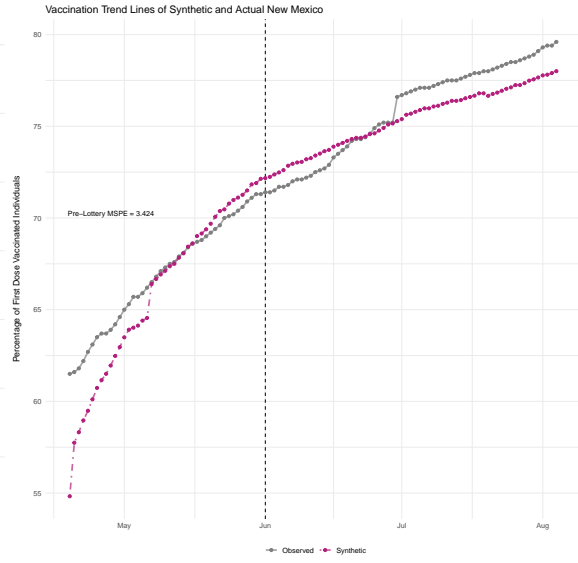

NV

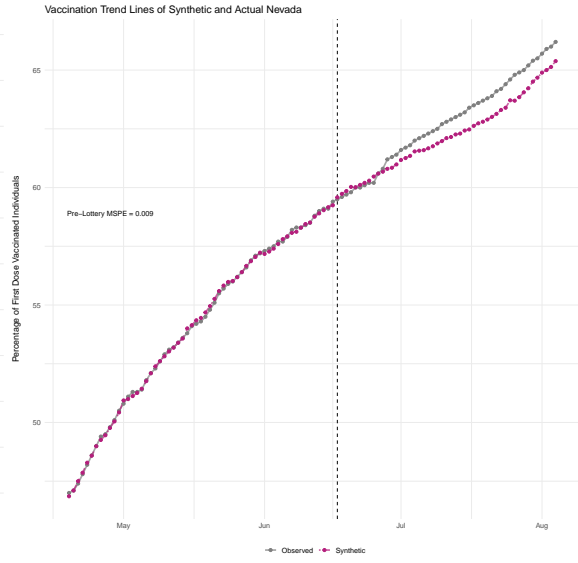

NY

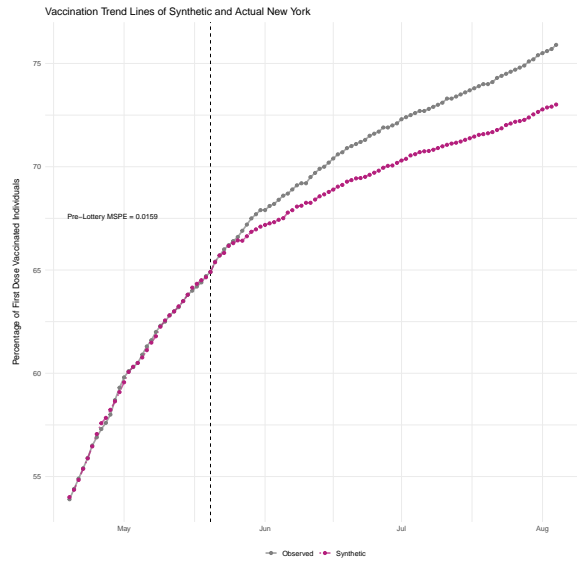

OH

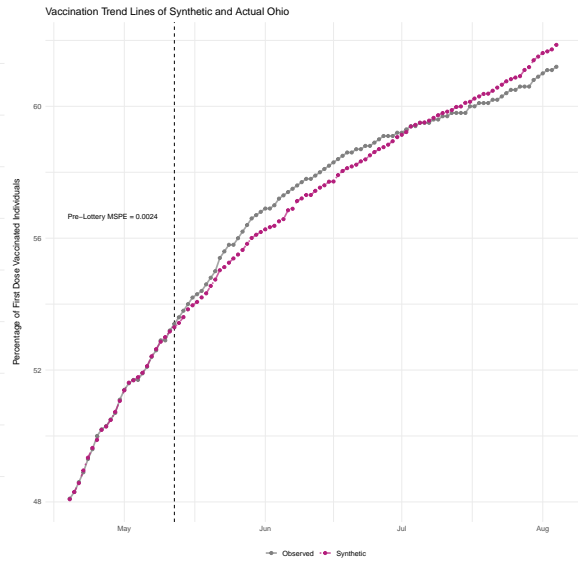

OR

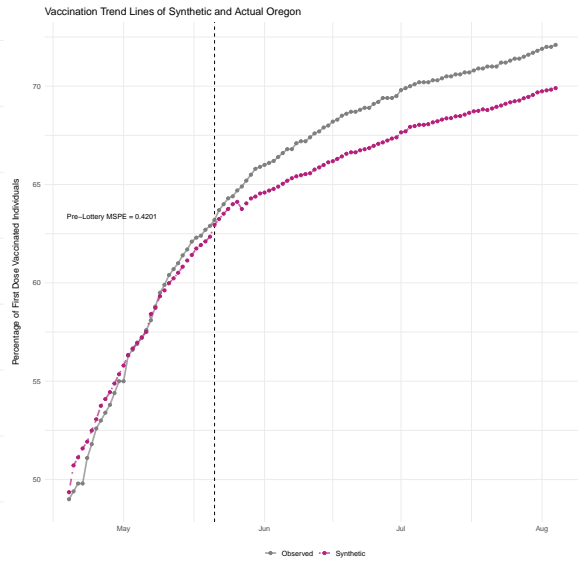

# WA

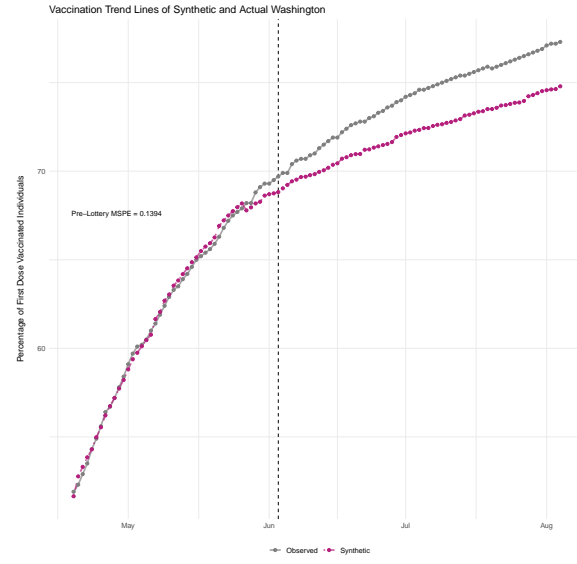

# WV

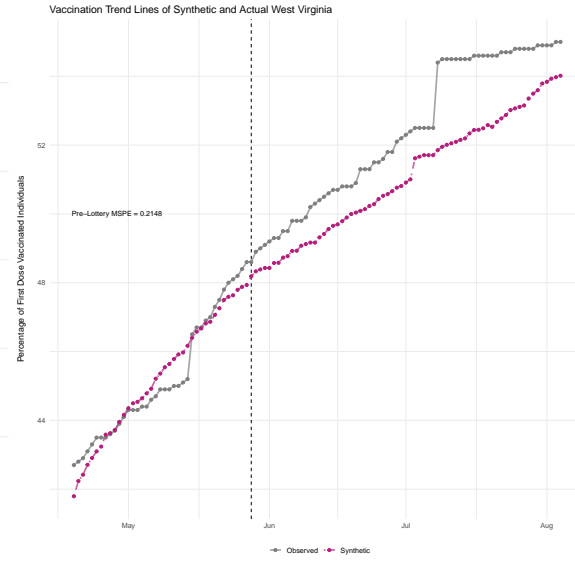

# Observed and Synthetic Vaccination Trend Lines by States with Lotteries (Complete)

AR

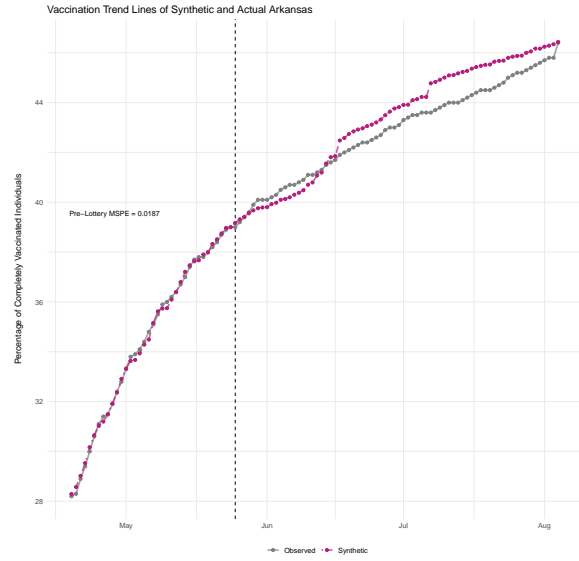

CA

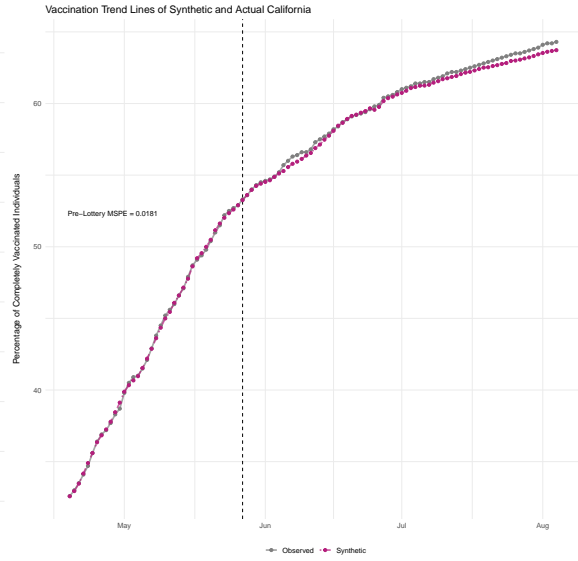

CO

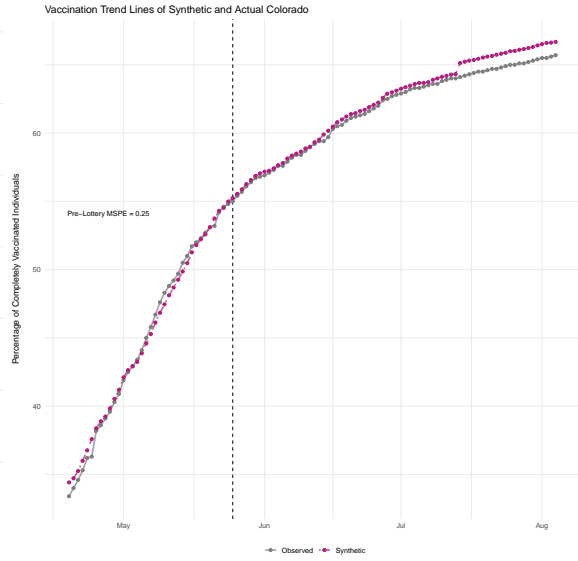

DE

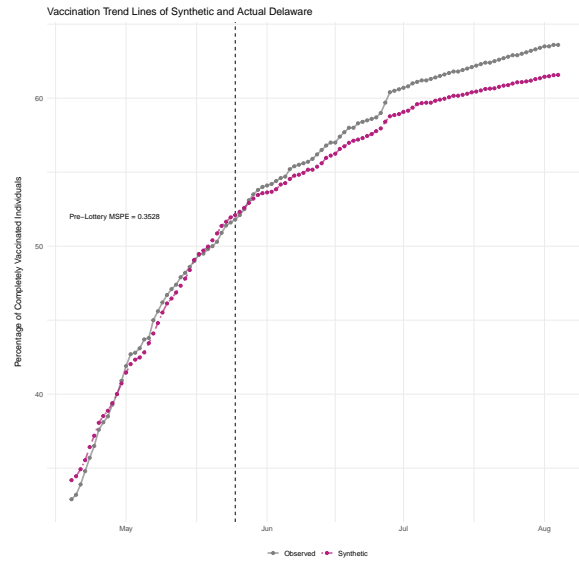

IL

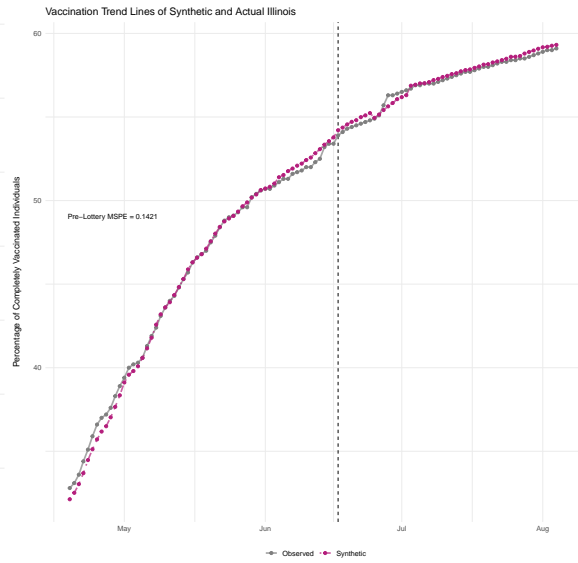

KY

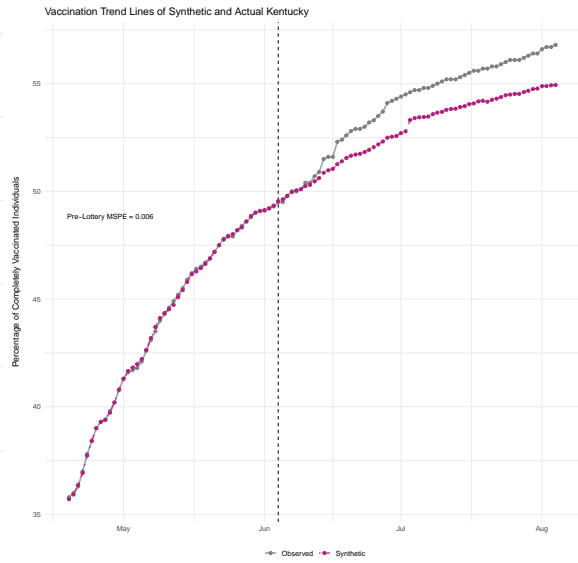

### LA

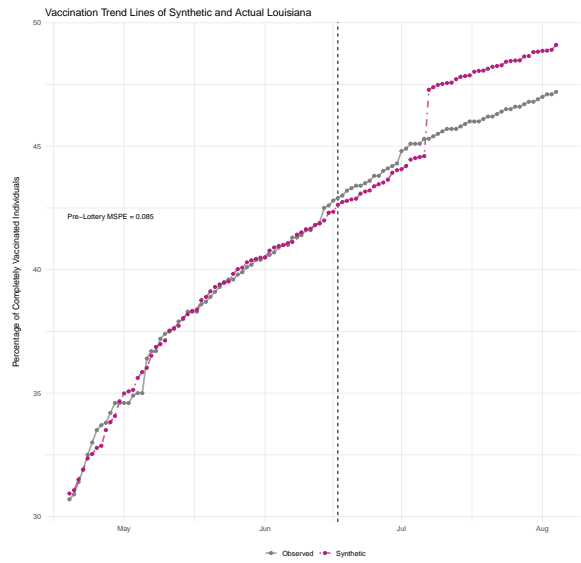

### MA

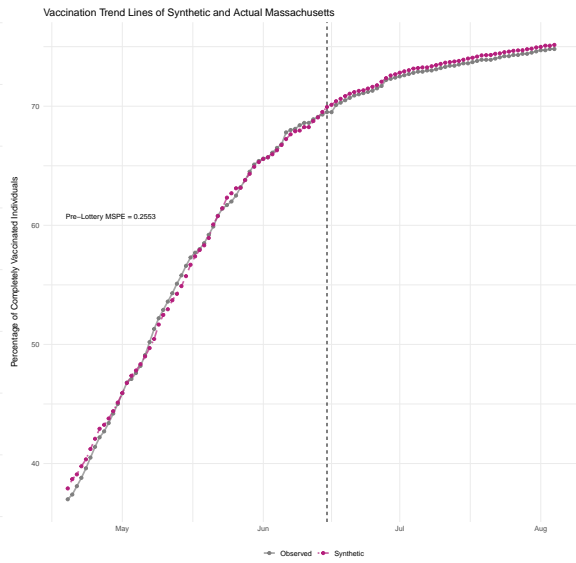

### MD

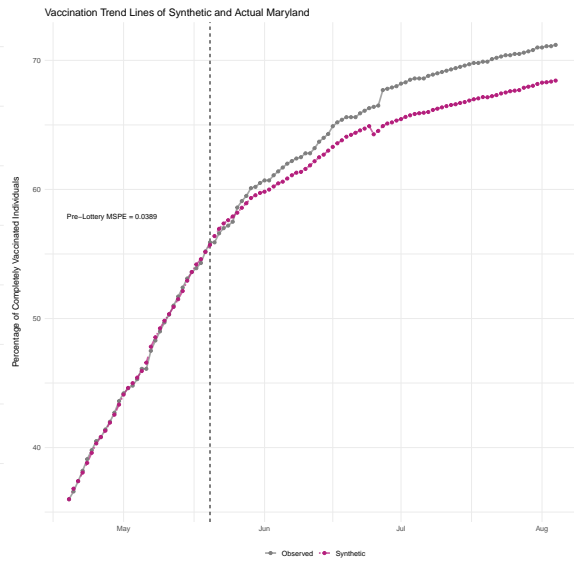

### ME

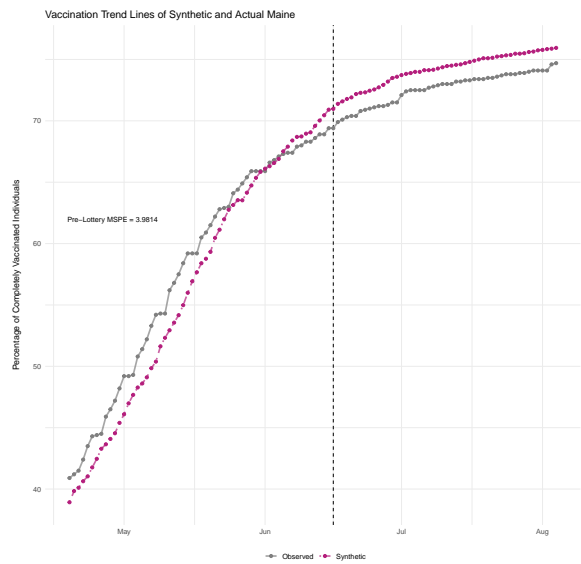

### MI

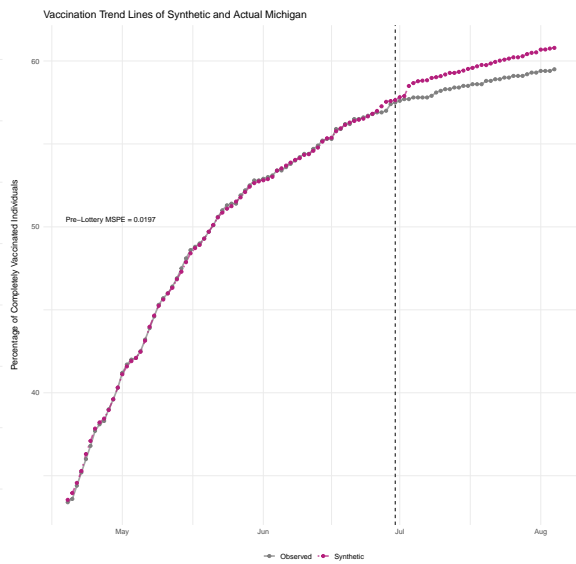

### MO

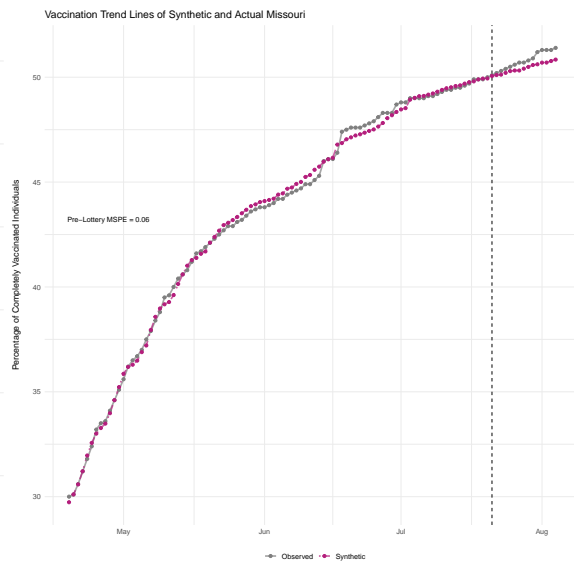

NC

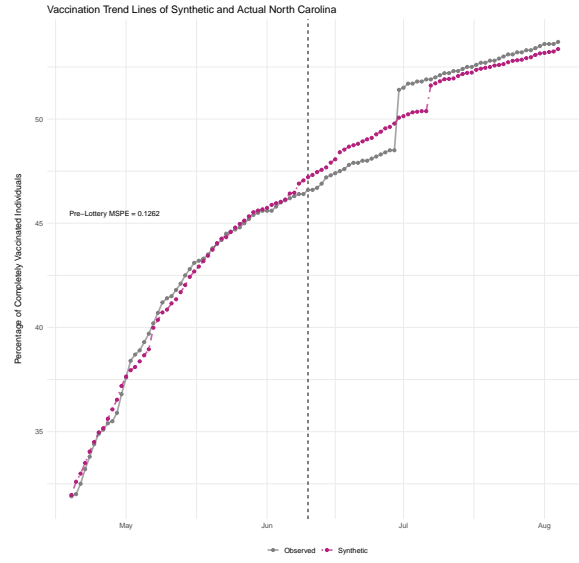

NM

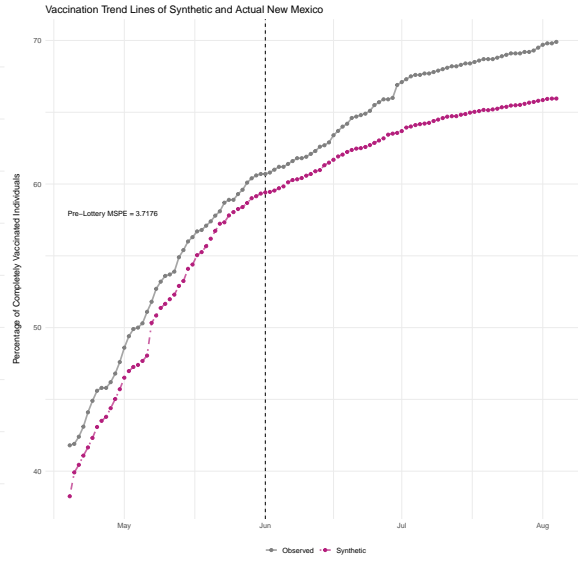

NV

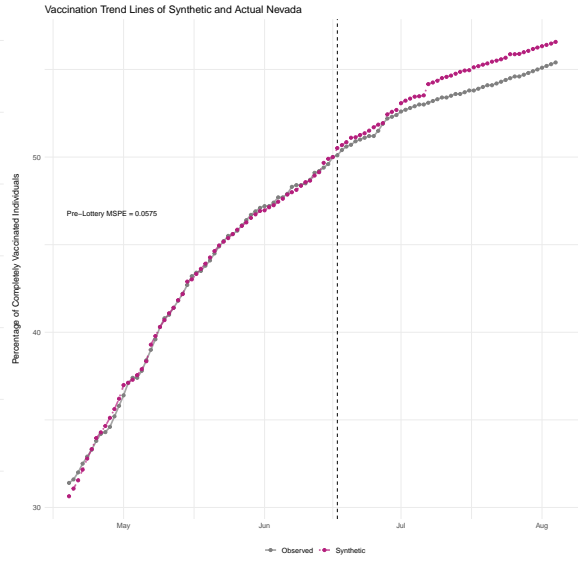

NY

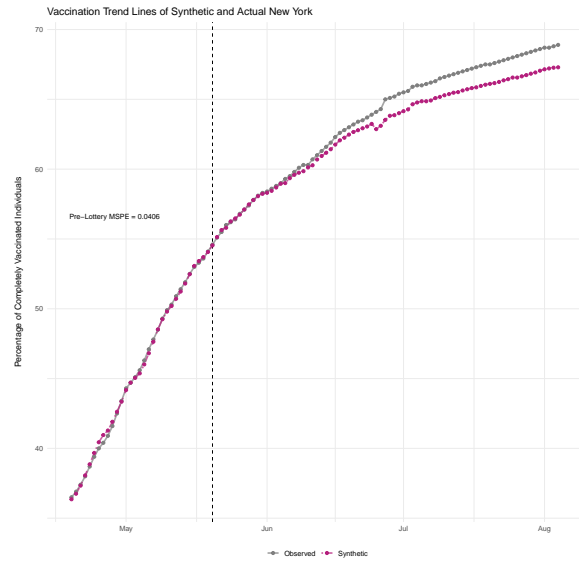

OH

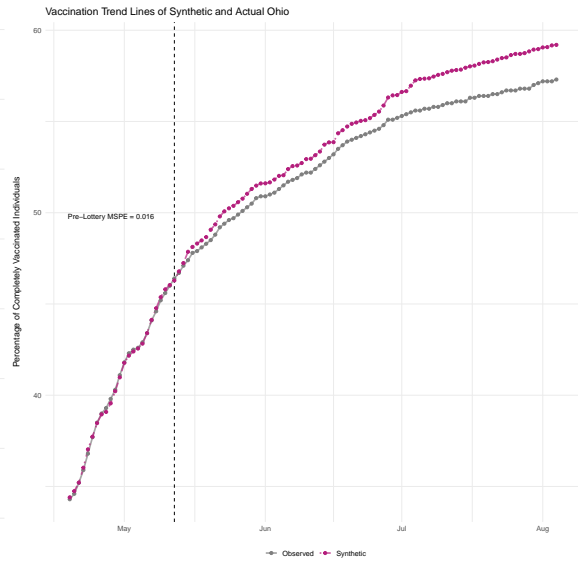

OR

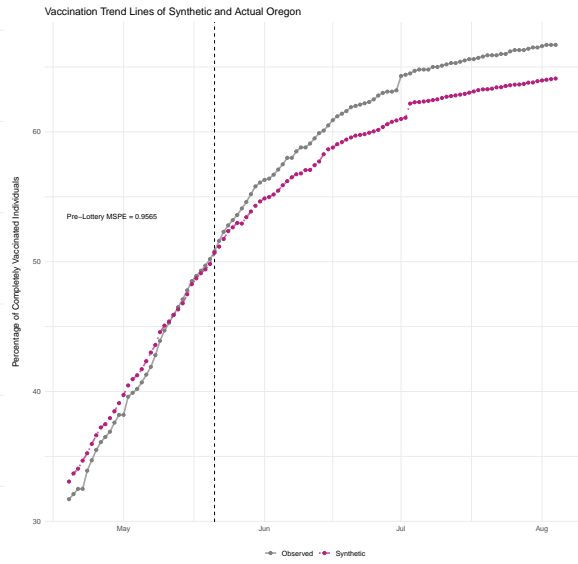

# WA

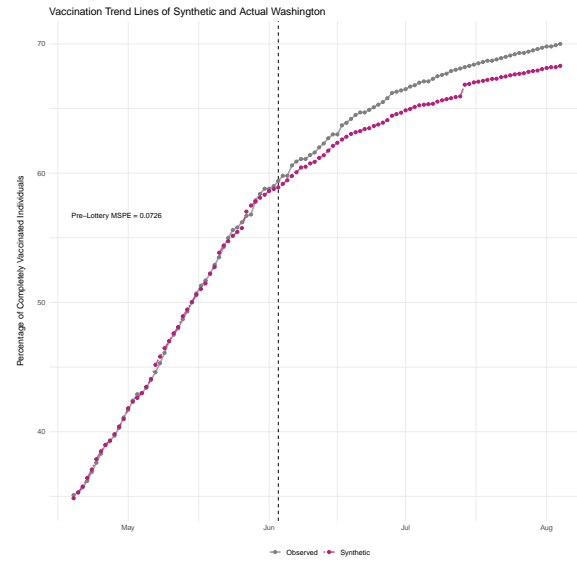

# WV

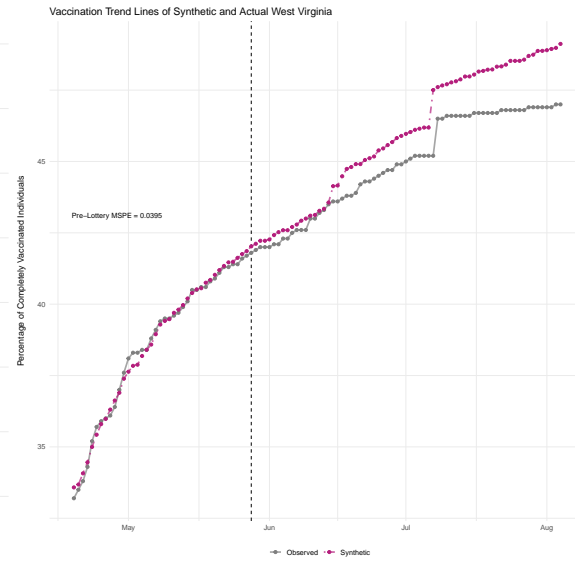



# Synthetic Control Weights (First-Dose)

AR

Synthetic Control Weights for Arkansas (First Dose)

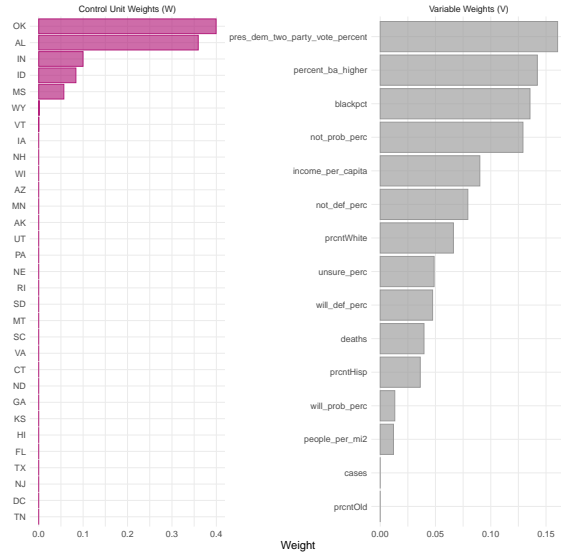

CA

Synthetic Control Weights for California (First Dose)

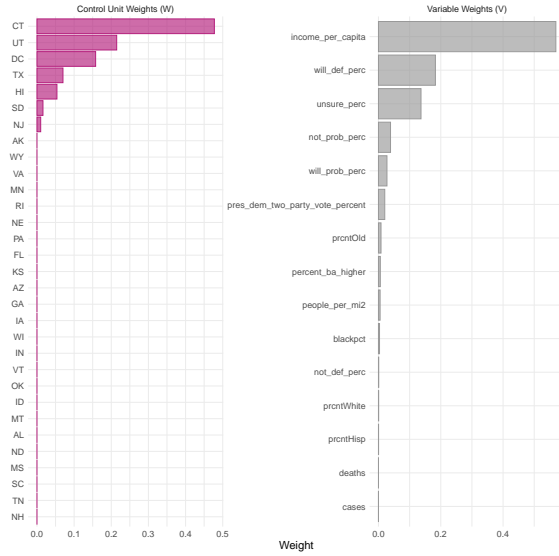

CO

Synthetic Control Weights for Colorado (First Dose)

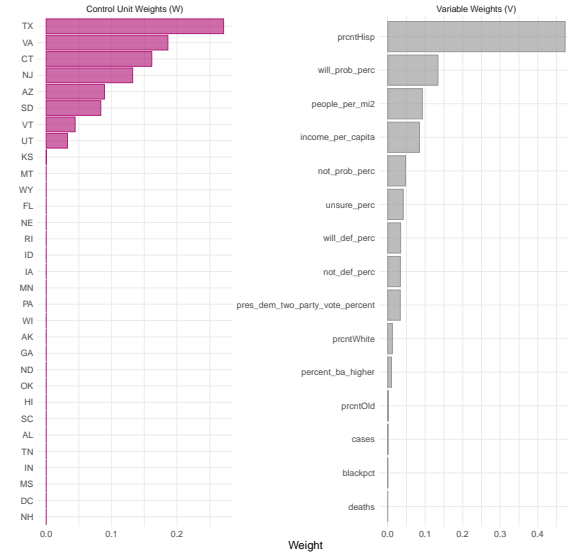

DE

Synthetic Control Weights for Delaware (First Dose)

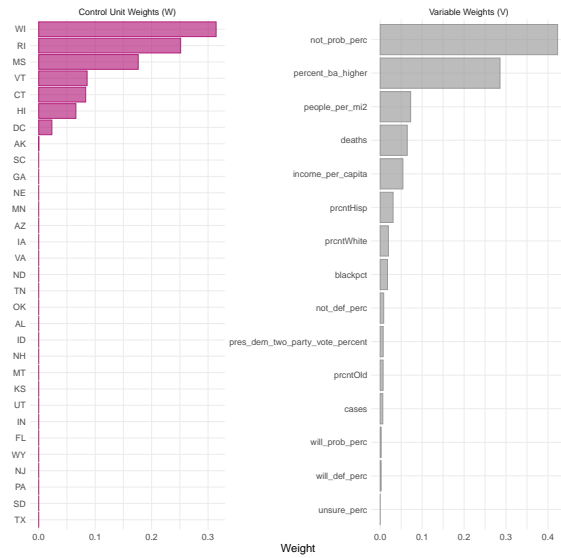

IL

Synthetic Control Weights for Illinois (First Dose)

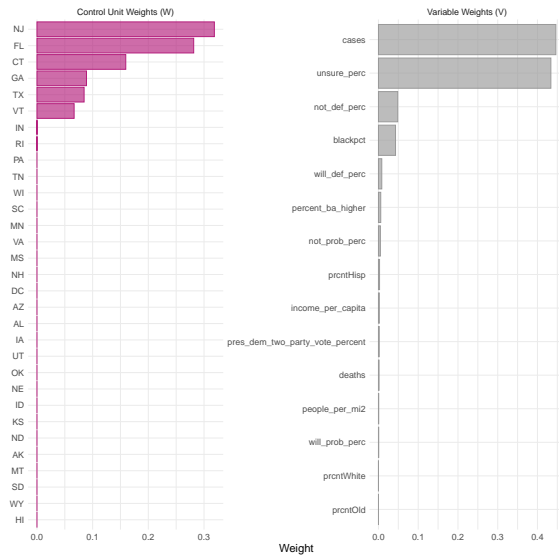

KY

Synthetic Control Weights for Kentucky (First Dose)

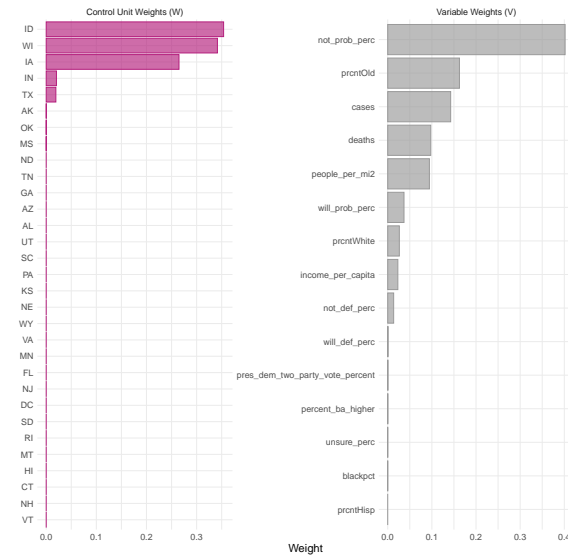

### LA

#### Synthetic Control Weights for Louisiana (First Dose)

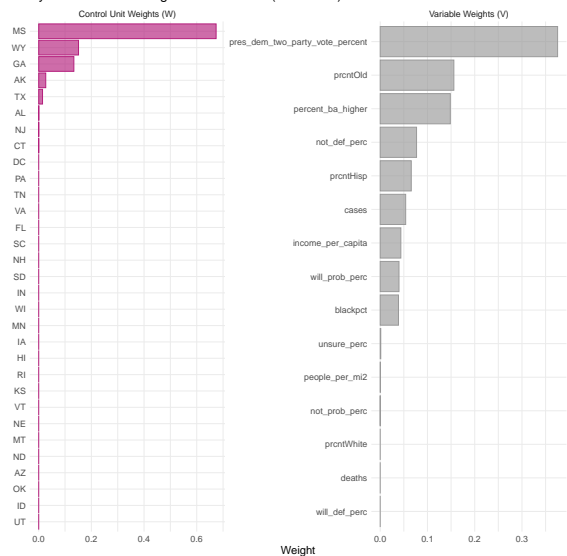

### MA

#### Synthetic Control Weights for Massachusetts (First Dose)

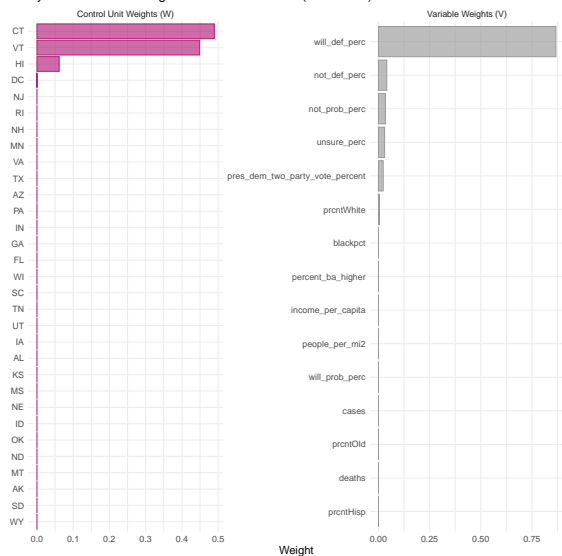

### MD

#### Synthetic Control Weights for Maryland (First Dose)

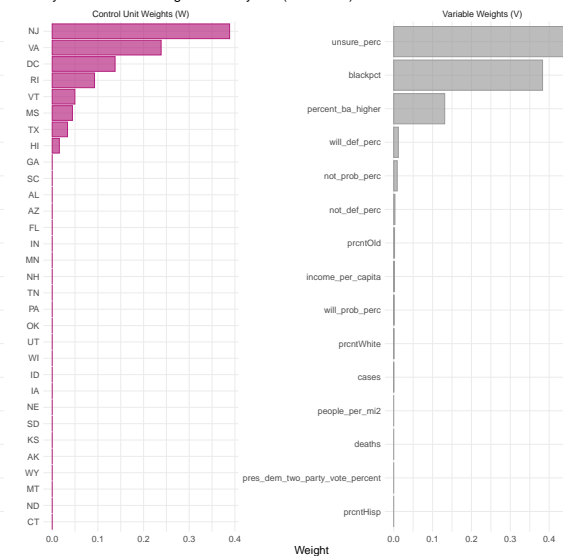

### ME

#### Synthetic Control Weights for Maine (First Dose)

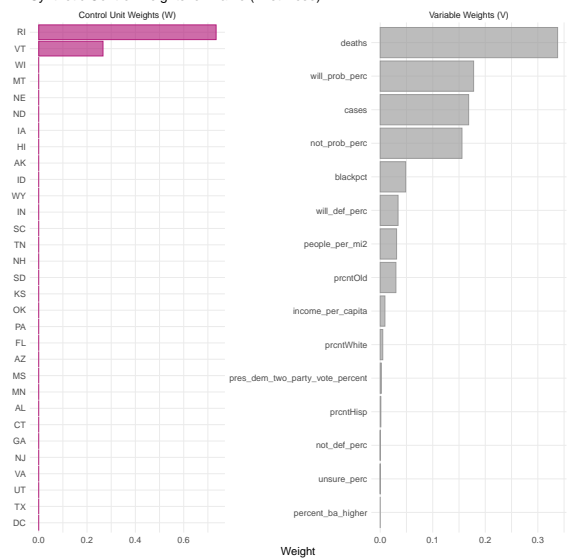

### MI

#### Synthetic Control Weights for Michigan (First Dose)

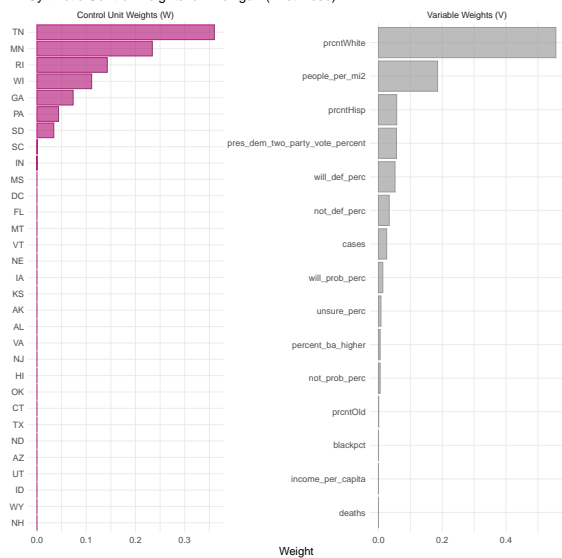

### MO

#### Synthetic Control Weights for Missouri (First Dose)

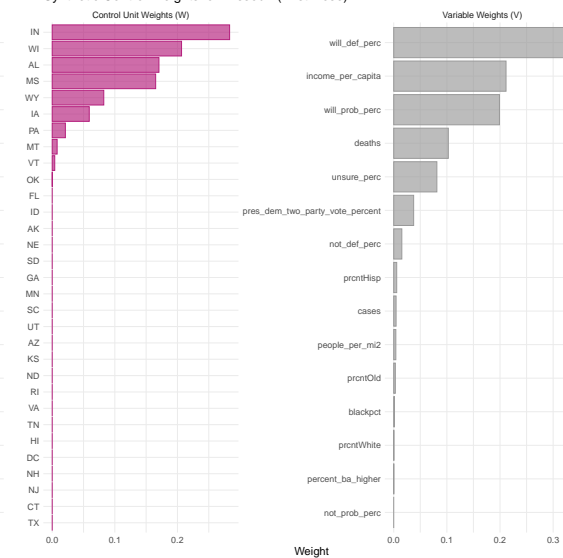

### NC

#### Synthetic Control Weights for North Carolina (First Dose)

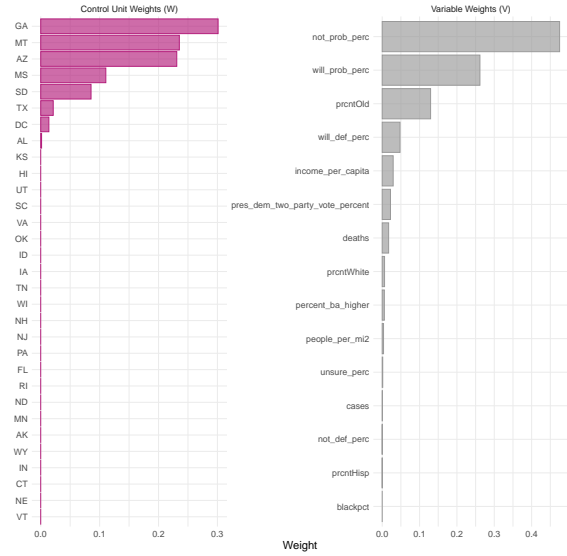

### NM

#### Synthetic Control Weights for New Mexico (First Dose)

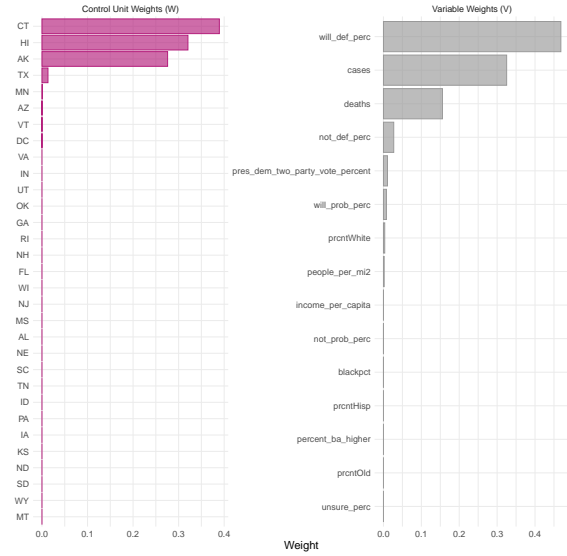

### NV

#### Synthetic Control Weights for Nevada (First Dose)

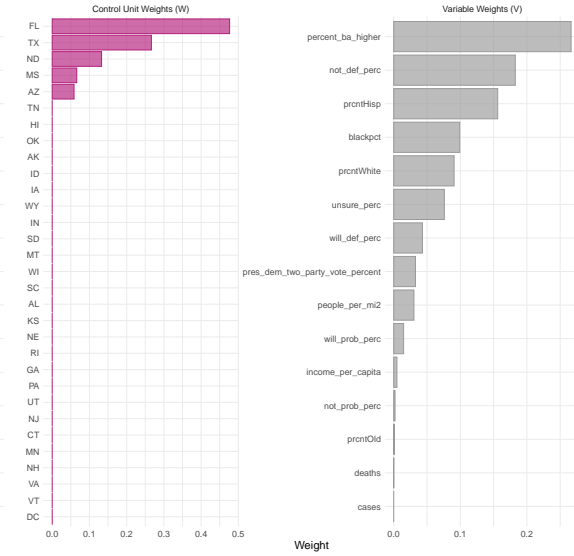

### NY

#### Synthetic Control Weights for New York (First Dose)

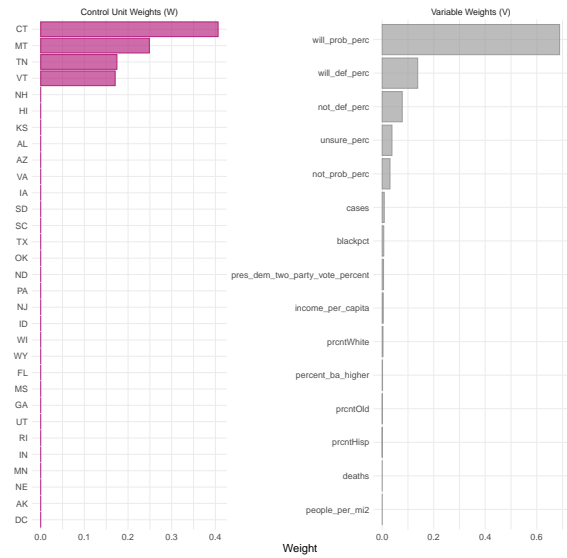

### OH

#### Synthetic Control Weights for Ohio (First Dose)

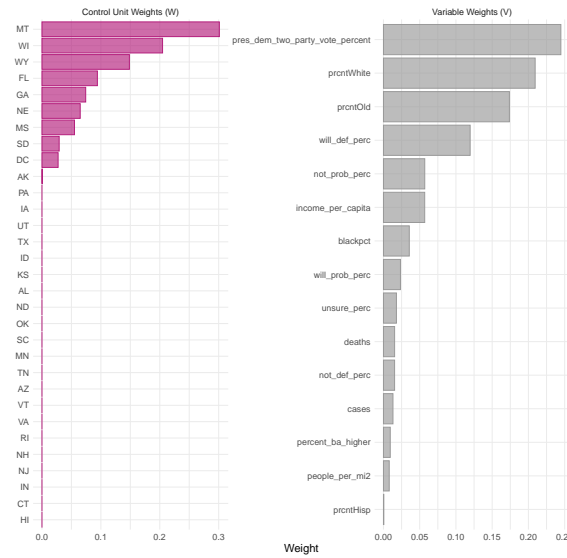

### OR

#### Synthetic Control Weights for Oregon (First Dose)

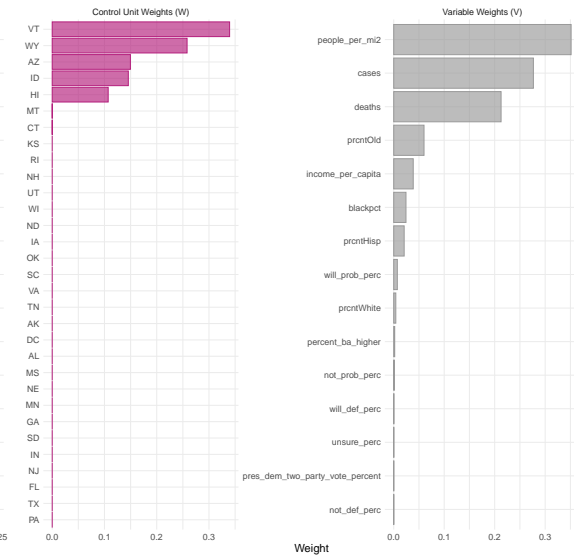

# WA

Synthetic Control Weights for Washington (First Dose)

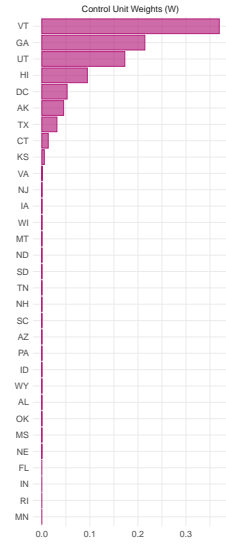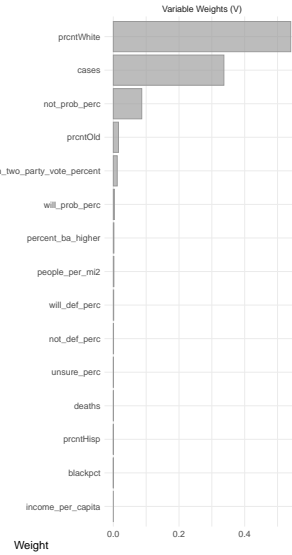

# WV

Synthetic Control Weights for West Virginia (First Dose)

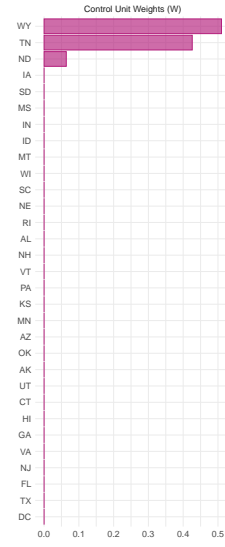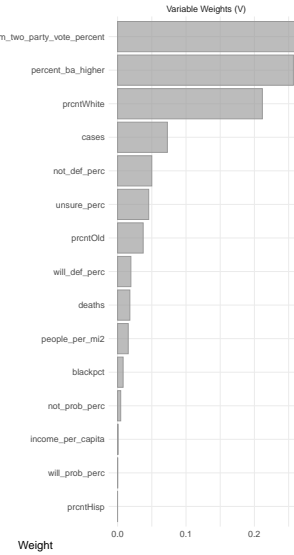

# Synthetic Control Weights (Complete)

AR

Synthetic Control Weights for Arkansas (Complete)

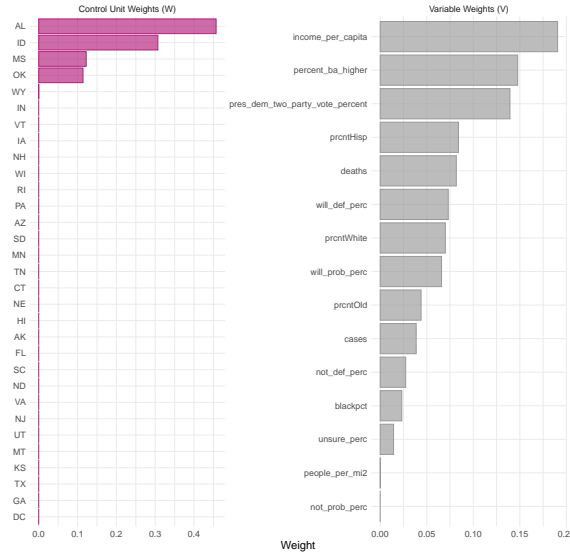

CA

Synthetic Control Weights for California (Complete)

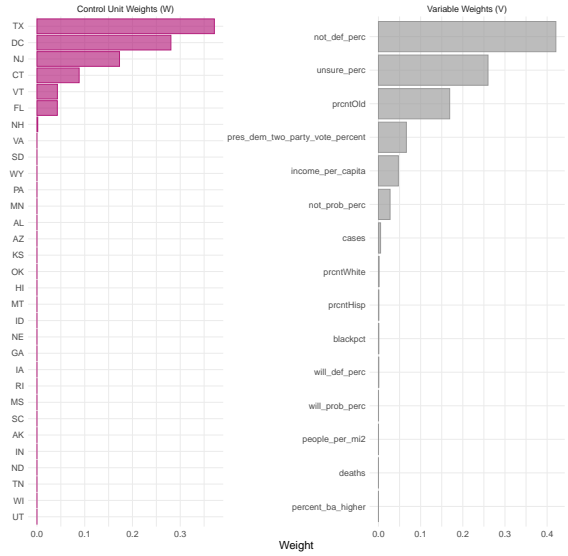

CO

Synthetic Control Weights for Colorado (Complete)

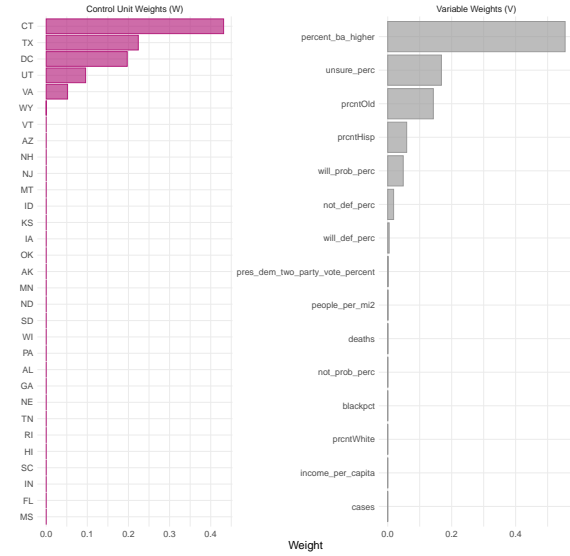

DE

Synthetic Control Weights for Delaware (Complete)

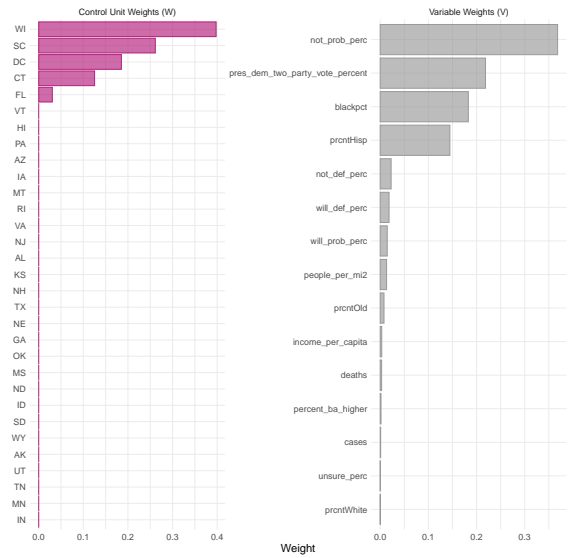

IL

Synthetic Control Weights for Illinois (Complete)

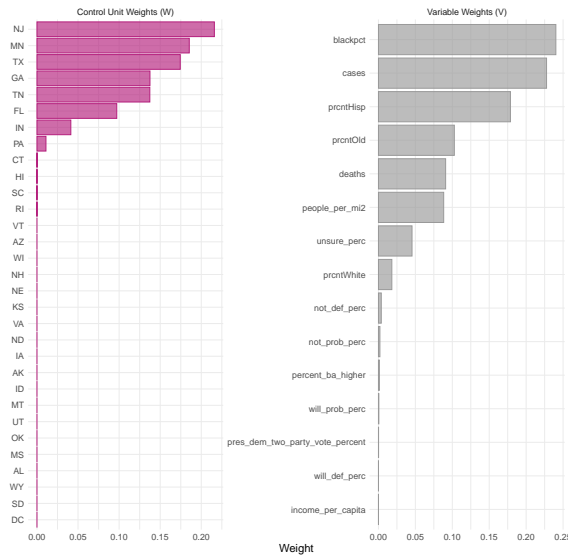

KY

Synthetic Control Weights for Kentucky (Complete)

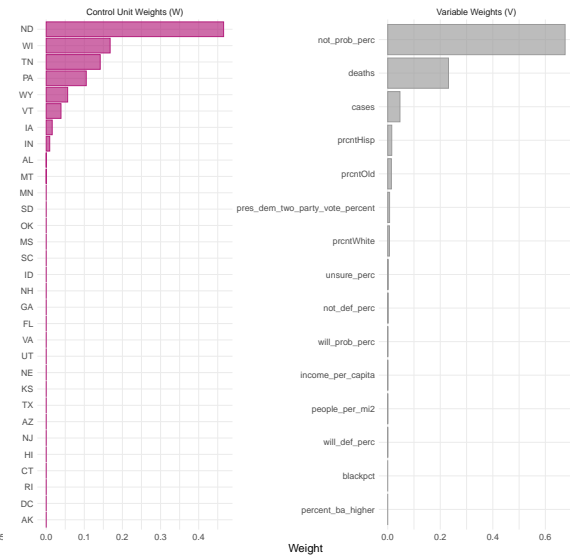

### LA

Synthetic Control Weights for Louisiana (Complete)

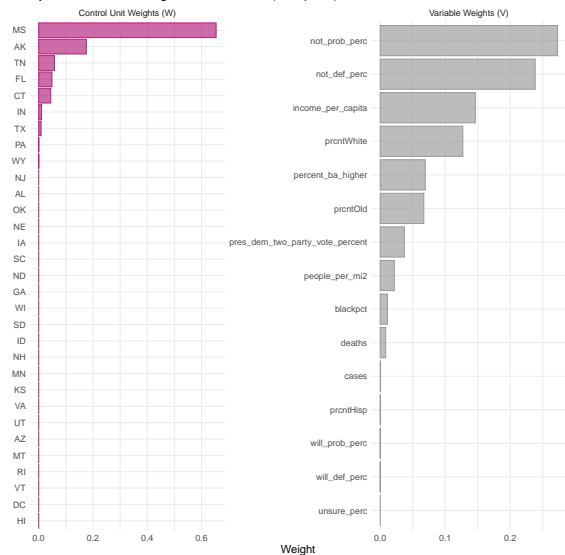

### MA

Synthetic Control Weights for Massachusetts (Complete)

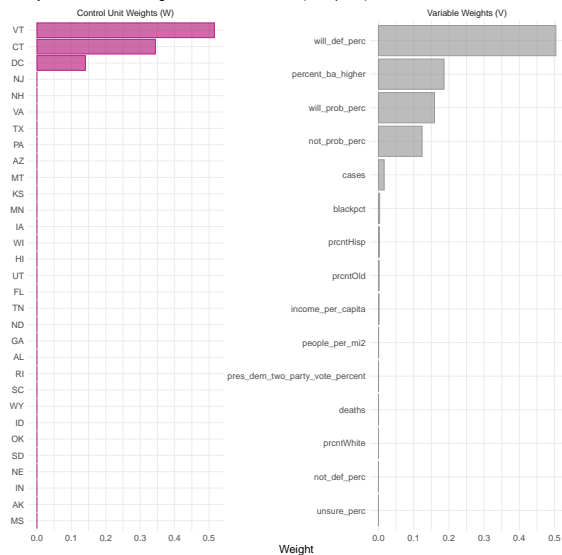

### MD

Synthetic Control Weights for Maryland (Complete)

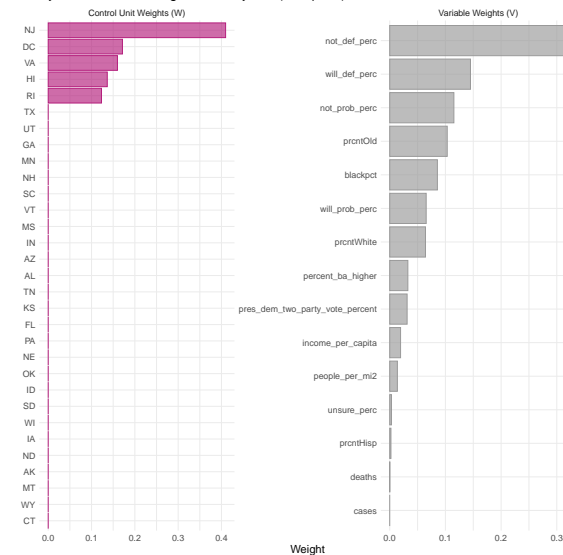

### ME

Synthetic Control Weights for Maine (Complete)

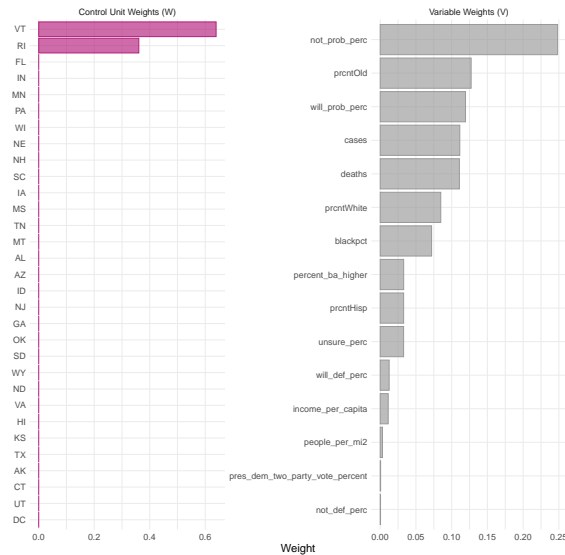

### MI

Synthetic Control Weights for Michigan (Complete)

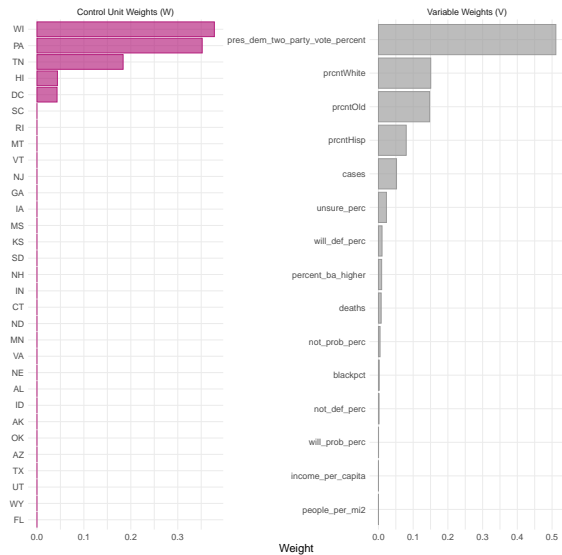

### MO

Synthetic Control Weights for Missouri (Complete)

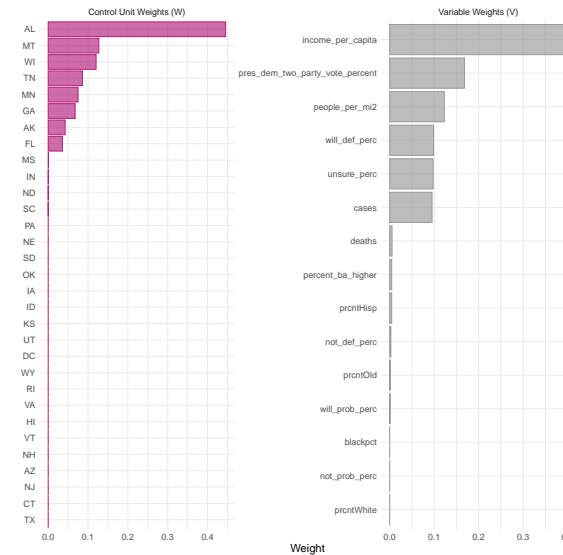

## NC

Synthetic Control Weights for North Carolina (Complete)

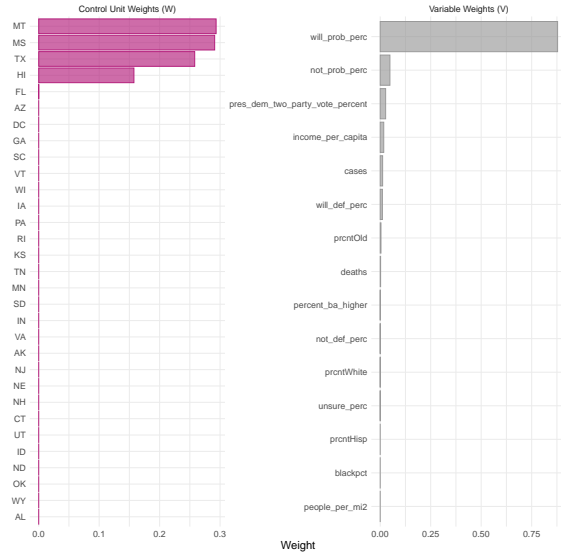

## NM

Synthetic Control Weights for New Mexico (Complete)

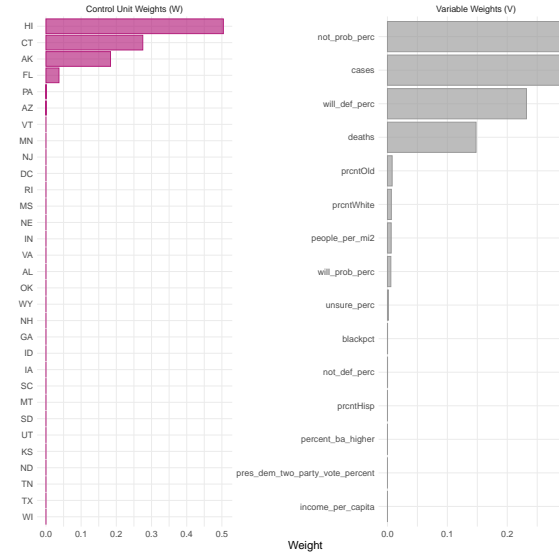

## NV

Synthetic Control Weights for Nevada (Complete)

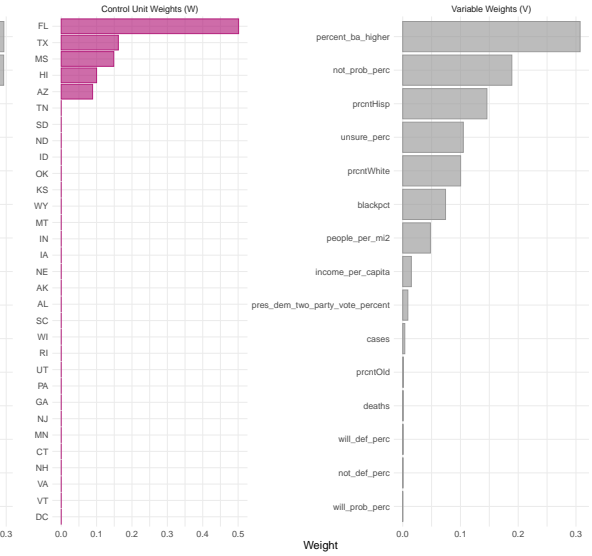

## NY

Synthetic Control Weights for New York (Complete)

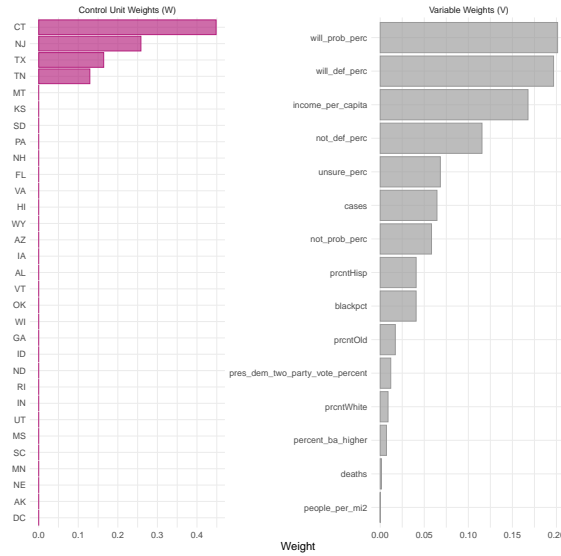

## OH

Synthetic Control Weights for Ohio (Complete)

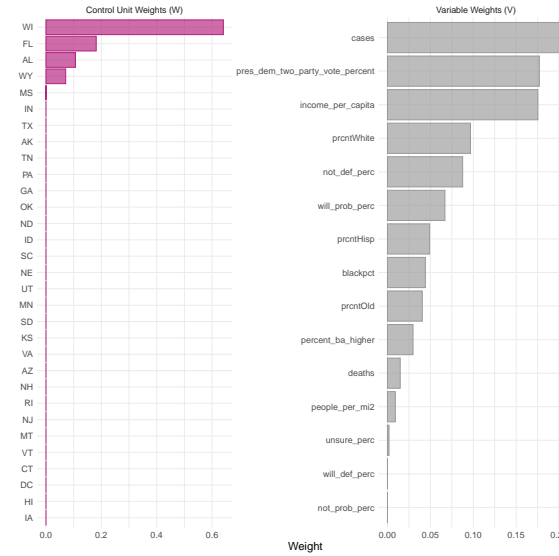

## OR

Synthetic Control Weights for Oregon (Complete)

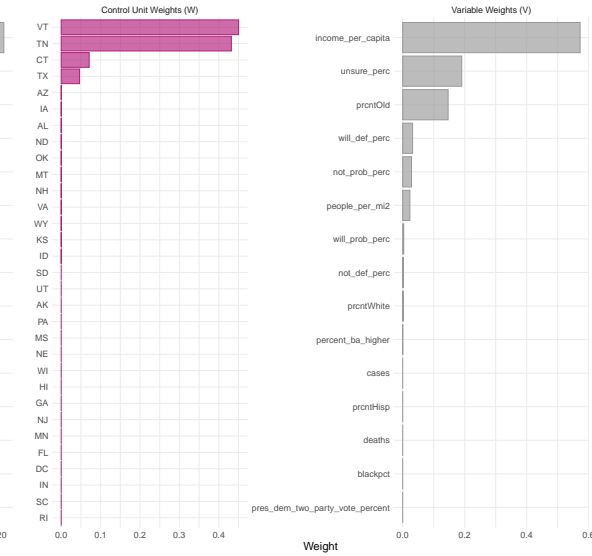

# WA

Synthetic Control Weights for Washington (Complete)

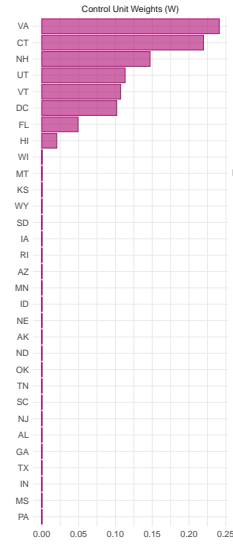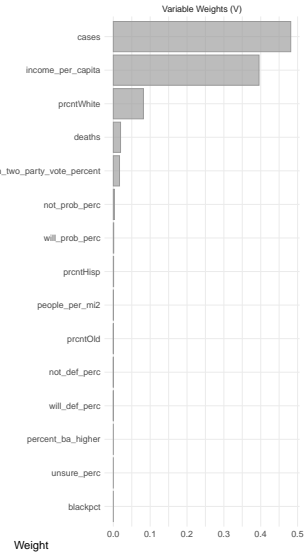

# WV

Synthetic Control Weights for West Virginia (Complete)

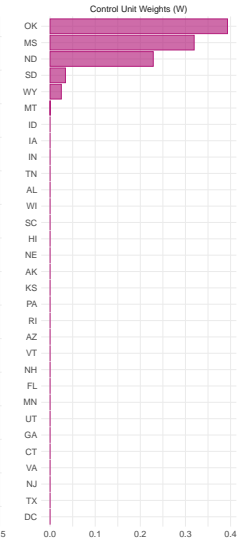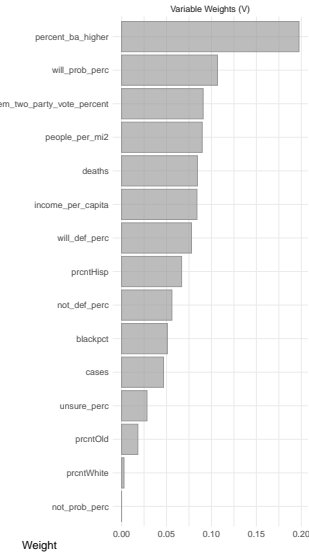

Supplement: pone.0274374.s002.pdf [file pone.0274374.s002.pdf]
