# Supplementary material for: Assessing the effectiveness of COVID-19 vaccine lotteries: A cross-state synthetic control methods approach
Source: PubMed Central journal article supplement (PMC9518920; doi:10.1371/journal.pone.0274374), 2022-09-28
Supplement: pone.0274374.s001.pdf [file pone.0274374.s001.pdf]

# Appendix S1

## Optimization Functions

Optimization was performed using all available methods in the R package `optimx` with the best-performing method's results being used. For more details on these specific methods, see pg.47–48 of `optimx`'s description file. These methods include:

- Nelder-Mead
- BFGS
- CG
- L-BFGS-B
- nlm
- nlminb
- spg
- ucminf
- newuoa
- bobyqa
- nmkb
- hjkb
- Rcgmin
- Rvmmin

We also set our `ipop` optimization options to:

```
margin_ipop = .02, (how close we get to the constraints)
sigf_ipop = 7, (the precision required, 7 significant figures)
bound_ipop = 6 (clipping bound for the variables)
```
